# Supplementary material for: An All-Organic Flexible Visible Light Communication System
Source: MDPI journal article supplement (doi:10.3390/s18093045), 2018-09-12
Supplement: s1 [file s1]

## Supplementary information to:

# All-organic flexible visible light communication system

César Vega-Colado<sup>1\*</sup>, Belén Arredondo<sup>2</sup>, Juan Carlos Torres<sup>1</sup>, Eduardo López-Fraguas<sup>1</sup>, Ricardo Vergaz<sup>1</sup>, Diego Martín-Martín<sup>2</sup>, Gonzalo del Pozo<sup>2</sup>, Beatriz Romero<sup>2</sup>, Palvi Apilo<sup>3</sup>, Xabier Quintana<sup>4</sup>, Morten A. Geday<sup>4</sup>, Cristina de Dios<sup>5</sup>, and José Manuel Sánchez-Pena<sup>1</sup>

<sup>1</sup> GDAF-UC3M, Dep. Tecnología Electrónica, Universidad Carlos III de Madrid

<sup>2</sup> DELFO-URJC, Dep. Tecnología Electrónica, Universidad Rey Juan Carlos, Madrid

<sup>3</sup> VTT Technical Research Centre of Finland Ltd., Oulu 90571, Finland

<sup>4</sup> CEMDATIC-UPM, Universidad Politécnica de Madrid, Madrid

<sup>5</sup> LuzWavelabs Inc. and Dep. Tecnología Electrónica, Universidad Carlos III de Madrid

### 1. Complete circuit diagram of the system.

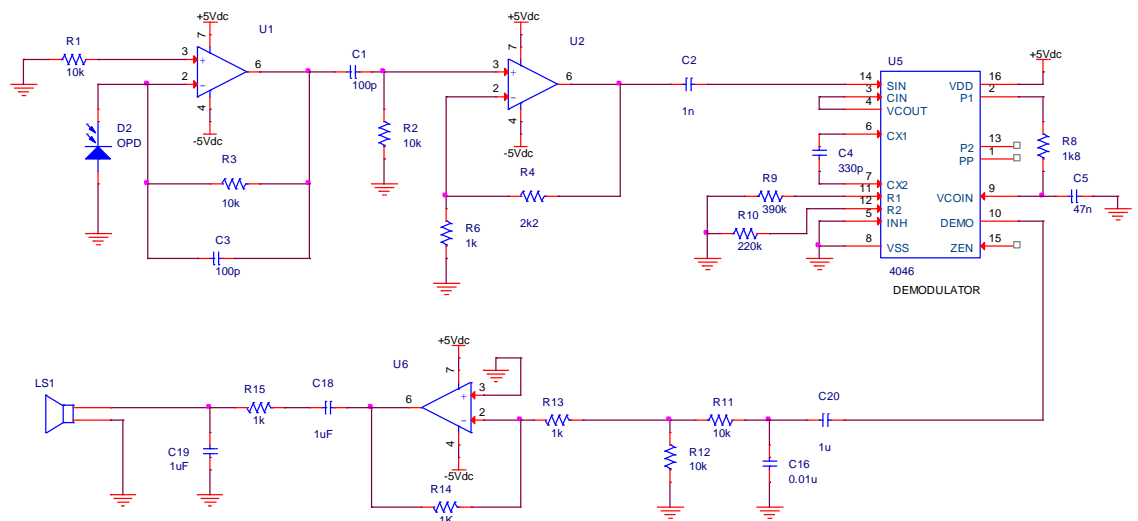

Fig. S1. Schematics of the reception circuit.

### 2. Detectivity computation:

The computation follows the reference:

Arredondo, B.; Dios, C. de; Vergaz, R.; Pozo, G. del; Romero, B. High-Bandwidth Organic Photodetector Analyzed by Impedance Spectroscopy. IEEE Photonics Technology Letters 2012, 24, 1868–1871, doi:10.1109/LPT.2012.2217488.

We have a responsivity of  $R = 0.144 \text{ A/W}$ .

Under dark conditions, at -1V applied, we get  $2 \cdot 10^{-3} \text{ mA/cm}^2$ .

As our device has an  $A = 0.25 \text{ cm}^2$  area, we get a dark current of  $I_D = 0.5 \text{ }\mu\text{A}$  in this case.

Then the NEP (Noise Equivalent Power) is:

$$NEP = \frac{\sqrt{\langle I_N^2 \rangle}}{R} = \frac{\sqrt{2eI_D}}{R}$$

with  $e$  the charge of the electron, giving  $2.78 \cdot 10^{-12} \text{ W/Hz}^{-1/2}$ .

Then, the detectivity can be obtained as:

$$D^* = \frac{\sqrt{A}}{NEP}$$

Leading to the  $1.8 \cdot 10^{11}$  Jones value that we have remarked in the text.

### 3. Linear response

Regarding the linear response of the OPD, we have measured it using a setup based on a LED set with a narrowband emission centred at 593 nm and a simple transimpedance amplifier. We show here the response, in a plot of generated current vs received optical power. The correlation coefficient to a linear fit is shown in the graph, and its value, 0.996, reveals a remarkable linearity.

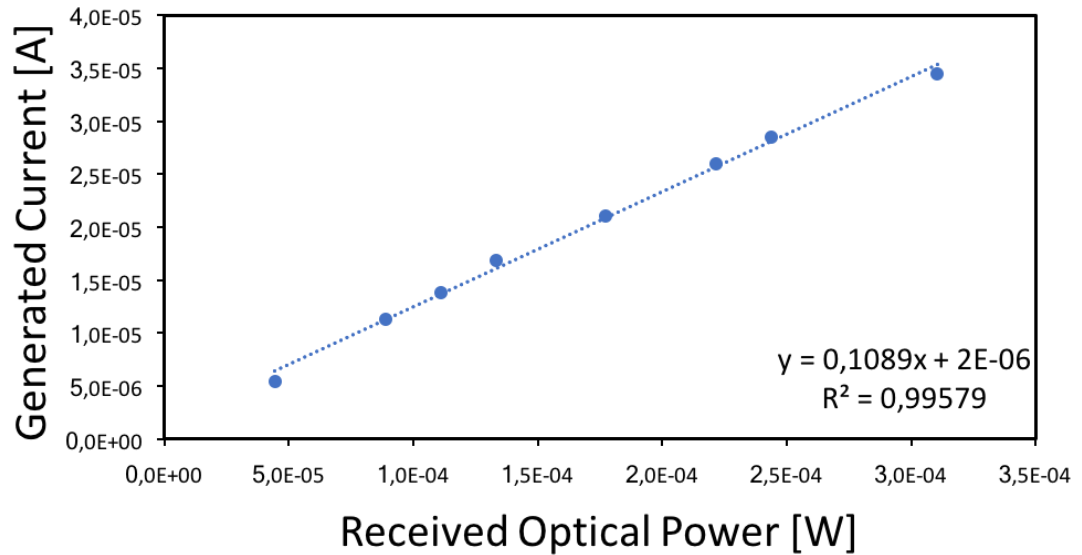

Fig. S2. Linear response of the OPD, and a linear fit with its correlation  $R^2$  coefficient.
